# Supplementary material
Source: PubMed Central journal article supplement (PMC7678817)
Supplement: NIHMS1538135-supplement-1.pdf [file NIHMS1538135-supplement-1.pdf]

## Supplementary Information

"Structure in personal networks: Constructing and comparing typologies"

Raffaele Vacca

Published in *Network Science*

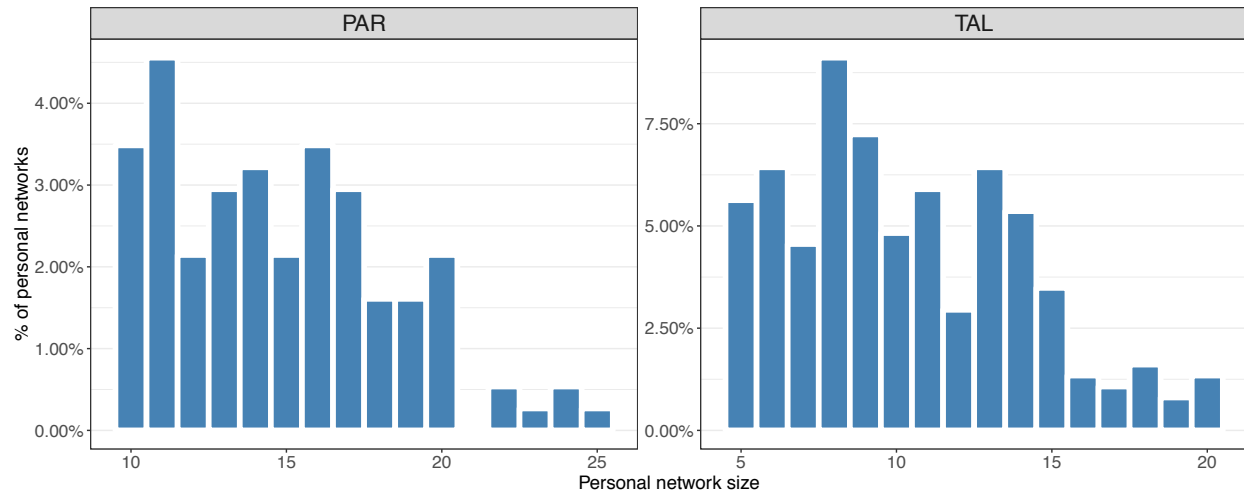

**Fig. S1.** Distribution of personal network size in the PAR and TAL datasets.

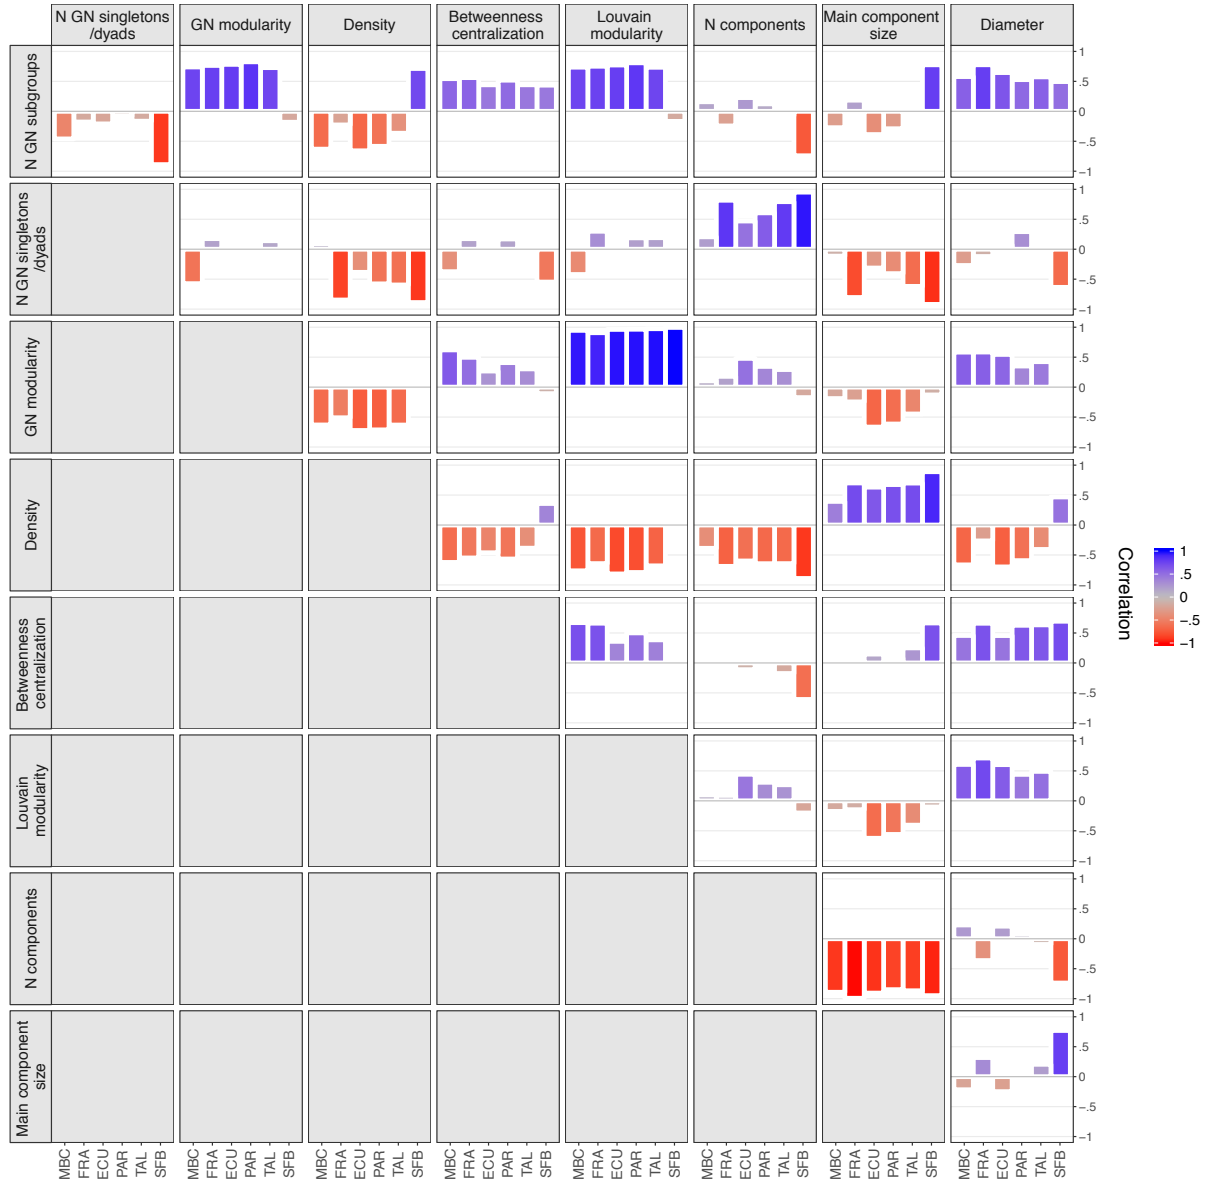

**Fig. S2.** Correlations between the  $T_1$  and  $T_2$  variables in the six datasets.

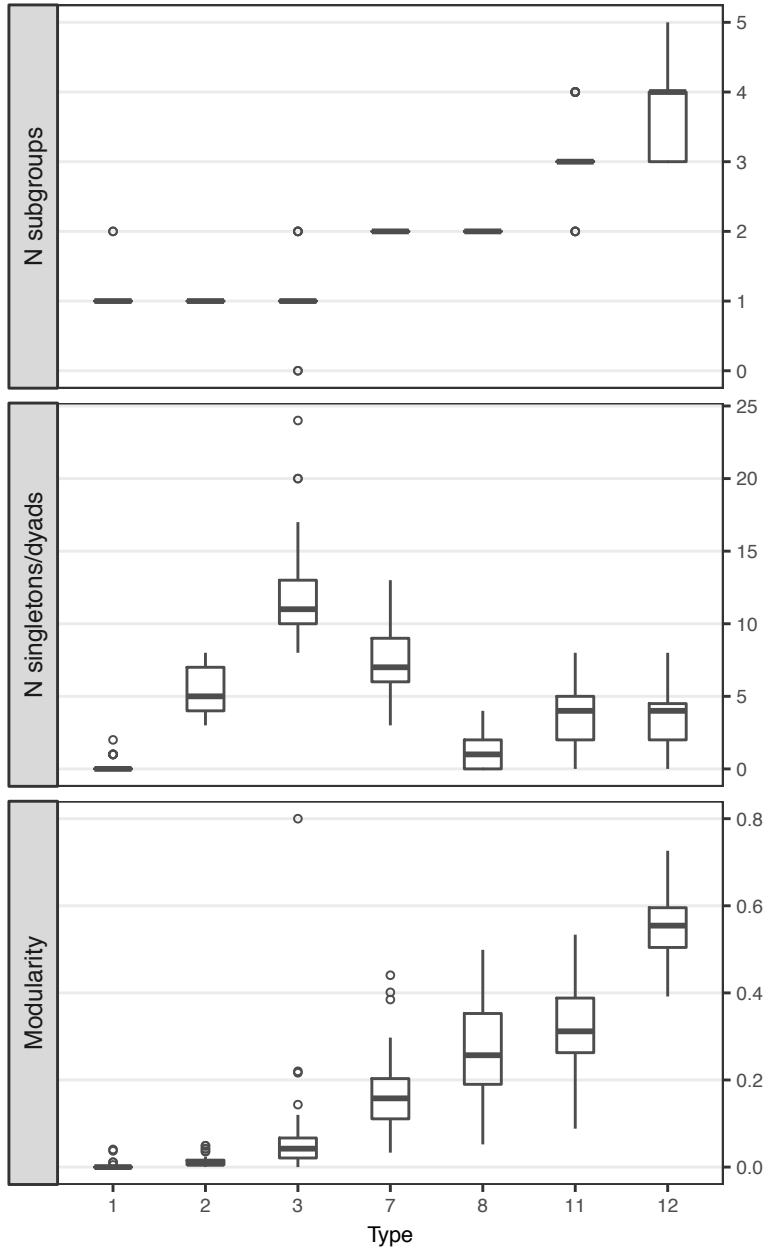

**Fig. S3.** Boxplots of the three  $T_1$  variables in each type for the ECU dataset. See Table 3 for numeric IDs of  $T_1$  types.

**Table S4.** Absolute frequencies (percentages) of BDG structural types ( $T_2$ ) in the six datasets.

| Type                            | MBC        | FRA        | ECU       | PAR       | TAL       | SFB       |
|---------------------------------|------------|------------|-----------|-----------|-----------|-----------|
| 1. Regular dense                | 79 (20.5)  | 189 (64.3) | 66 (25)   | 28 (23.5) | 48 (18.9) |           |
| 2. Centered dense               |            |            |           | 52 (43.7) |           |           |
| 3. Centered star                | 127 (33)   | 28 (9.5)   |           | 28 (23.5) |           |           |
| 4. Centered star/Pearl collar   |            |            | 29 (11)   |           | 66 (26)   |           |
| 5. Pearl collar                 |            |            | 40 (15.2) |           |           |           |
| 6. Dispersed                    | 9 (2.3)    | 10 (3.4)   | 33 (12.5) | 9 (7.6)   | 53 (20.9) |           |
| 7. Disconnected                 |            | 20 (6.8)   |           | 2 (1.7)   | 9 (3.5)   |           |
| 8. Small regular dense          |            |            |           |           | 31 (12.2) | 42 (11.5) |
| 9. Small centered star          |            |            |           |           |           | 31 (8.5)  |
| 10. Small segmented             |            |            |           |           |           | 60 (16.4) |
| 11. Closed triad and isolates   |            |            |           |           |           | 42 (11.5) |
| 12. Open triad and isolates     |            |            |           |           |           | 30 (8.2)  |
| 13. Connected dyad and isolates |            |            |           |           |           | 88 (24)   |
| 14. Small disconnected          |            |            |           |           |           | 34 (9.3)  |
| 15. Hybrid                      | 170 (44.2) | 47 (16)    | 96 (36.4) |           | 47 (18.5) | 39 (10.7) |
| Total                           | 385 (100)  | 294 (100)  | 264 (100) | 119 (100) | 254 (100) | 366 (100) |
| N types                         | 4          | 5          | 5         | 5         | 6         | 8         |

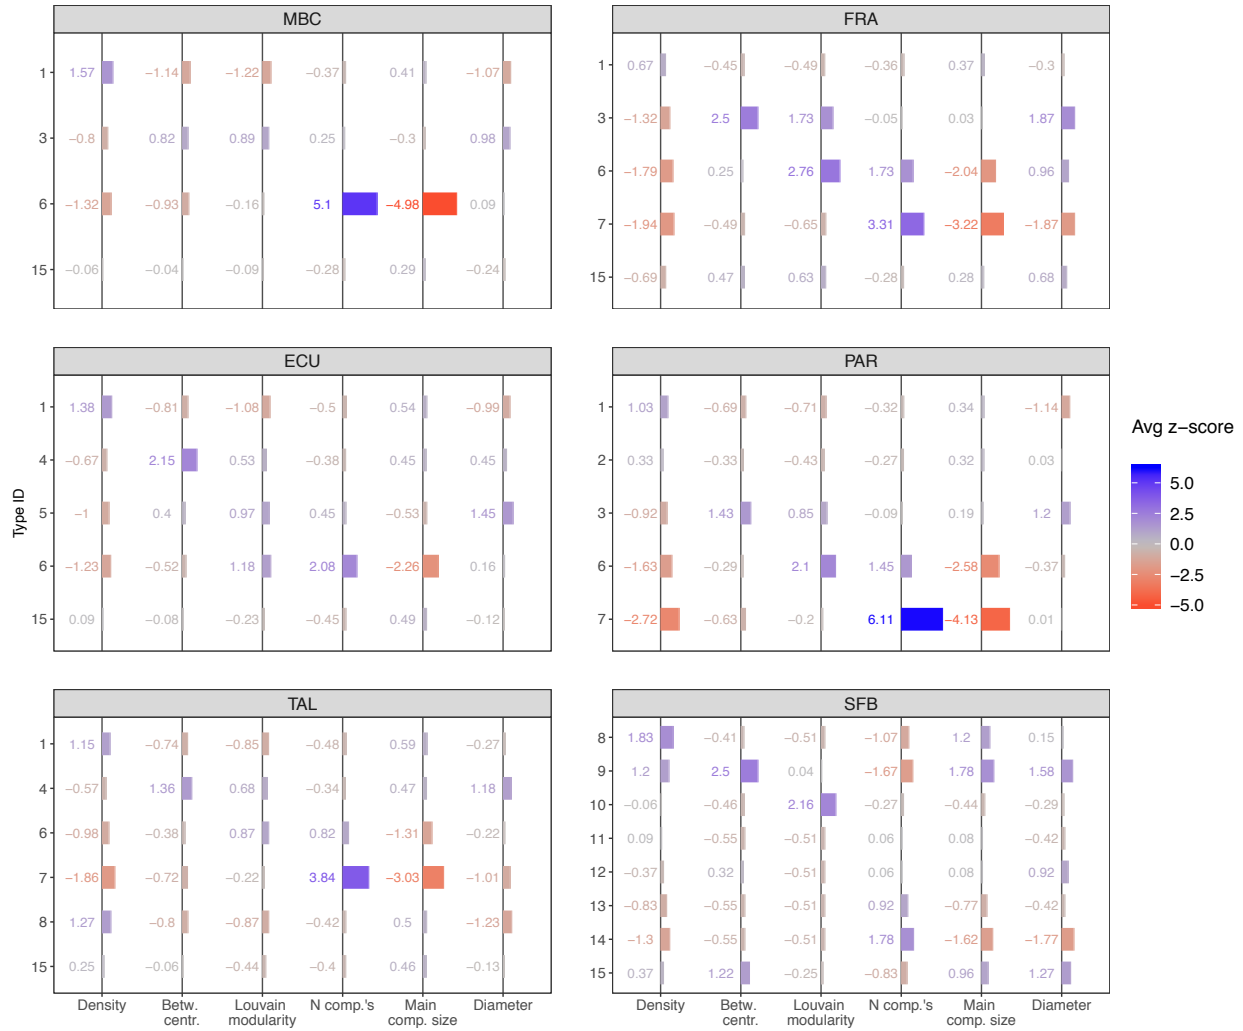

Fig. S5. Average z-scores of the six  $T_2$  variables in each type in the six datasets. See Table S4 for numeric IDs of  $T_2$  types.
